# Supplementary material for: Allergen Diversity and Abundance in Different Tissues of the Redclaw Crayfish (Cherax quadricarinatus)
Source: MDPI journal article supplement (doi:10.3390/foods13020315), 2024-01-19
Supplement: s1 [file s1]

## **Supplementary Tables**

**Supplementary Table S1:** Selected Patients from Adult and Paediatric Populations. Patients were either adults or paediatrics and were shellfish-sensitive (to shrimp-mix) as found on ALEX assay chip. Patients who were negative to shrimp-mix were chosen as negative controls.

| Patient Number                                      | JCU ID | Sex | Adult/Paediatric (A/P) | Shrimp Positive? (Y/N) |
|-----------------------------------------------------|--------|-----|------------------------|------------------------|
| <b>Shellfish-Sensitive Patients (to Shrimp-Mix)</b> |        |     |                        |                        |
| 1                                                   | JCU 6  | F   | P                      | Y                      |
| 2                                                   | JCU 27 | F   | P                      | Y                      |
| 3                                                   | JCU 31 | M   | P                      | Y                      |
| 4                                                   | JCU 34 | M   | P                      | Y                      |
| 5                                                   | JCU 40 | M   | P                      | Y                      |
| 6                                                   | JCU 47 | F   | P                      | Y                      |
| 7                                                   | JCU 48 | M   | P                      | Y                      |
| 8                                                   | JCU 58 | M   | P                      | Y                      |
| 9                                                   | JCU 72 | M   | P                      | Y                      |
| 10                                                  | JCU 77 | F   | P                      | Y                      |
| 11                                                  | JCU 87 | M   | P                      | Y                      |
| 12                                                  | JCU 88 | M   | P                      | Y                      |
| 13                                                  | JCU 93 | F   | P                      | Y                      |
| 14                                                  | JCU 8  | F   | A                      | Y                      |
| 15                                                  | JCU 14 | M   | A                      | Y                      |
| 16                                                  | JCU 16 | F   | A                      | Y                      |
| 17                                                  | JCU 19 | F   | A                      | Y                      |
| 18                                                  | JCU 43 | M   | A                      | Y                      |
| 19                                                  | JCU 50 | F   | A                      | Y                      |
| 20                                                  | JCU 54 | F   | A                      | Y                      |
| 21                                                  | JCU 55 | M   | A                      | Y                      |
| 22                                                  | JCU 59 | F   | A                      | Y                      |
| 23                                                  | JCU 60 | F   | A                      | Y                      |
| 24                                                  | JCU 86 | M   | A                      | Y                      |
| <b>Control Patients (Negative to Shrimp-Mix)</b>    |        |     |                        |                        |
| 1                                                   | JCU 10 | F   | A                      | N                      |
| 2                                                   | JCU 33 | M   | A                      | N                      |
| 3                                                   | JCU 69 | F   | A                      | N                      |

**Supplementary Table S2:** IgE-Binding in Raw Claw Analysed Using Liquid Chromatography-Mass Spectrometry. Top four most abundant proteins found for bands 1 - 4, including molecular weight (kDa), protein ID (NCBI), proteins found in each group, relative abundance (iBAQ%), coverage (%), protein MW (kDa).

| Band | MW of Band | Hit | Protein ID (NCBI)      | Protein Name                                          | Proteins in Group | Relative Abundance (iBAQ%) | Coverage (%) | MW of Protein |
|------|------------|-----|------------------------|-------------------------------------------------------|-------------------|----------------------------|--------------|---------------|
| 1    | 75 kDa     | 1   | AFP23115.1             | <b>Hemocyanin</b>                                     | 1                 | 61.66%                     | 31.5%        | 78 kDa        |
|      |            | 2   | XP_053640584.1         | Hemocyanin subunit-like                               | 51                | 11.84%                     | 28.6%        | 78 kDa        |
|      |            | 3   | XP_053640579.1         | Hemocyanin subunit-like                               | 1                 | 6.11%                      | 29.9%        | 78 kDa        |
|      |            | 4   | XP_053639178.1         | Hemocyanin-like                                       | 8                 | 4.80%                      | 29.3%        | 76 kDa        |
| 2    | 74 kDa     | 1   | XP_053627537.1         | <b>Hemocyanin B chain-like</b>                        | 27                | 38.44%                     | 48.8%        | 78 kDa        |
|      |            | 2   | XP_053645744.1         | Arginine kinase                                       | 107               | 14.81%                     | 36.2%        | 50 kDa        |
|      |            | 3   | XP_053639179.1         | Hemocyanin A chain-like                               | 1                 | 9.56%                      | 17.6%        | 64 kDa        |
|      |            | 4   | AFP23115.1             | Hemocyanin                                            | 1                 | 6.96%                      | 37.2%        | 78 kDa        |
| 3    | 37 kDa     | 1   | XP_053645744.1         | <b>Arginine kinase</b>                                | 107               | 78.21%                     | 42.2%        | 50 kDa        |
|      |            | 2   | XP_053649889.1         | Fructose-biphosphate aldolase                         | 7                 | 7.80%                      | 65.2%        | 40 kDa        |
|      |            | 3   | XP_053648131.1         | Tropomyosin isoform X17                               | 9                 | 2.34%                      | 60.9%        | 33 kDa        |
|      |            | 4   | sp P14208.4 KARG_HOMGA | Arginine kinase                                       | 7                 | 1.91%                      | 30.9%        | 40 kDa        |
| 4    | 36 kDa     | 1   | XP_053645744.1         | <b>Arginine kinase</b>                                | 107               | 70.25%                     | 36.2%        | 50 kDa        |
|      |            | 2   | XP_045608276.1         | Four and a half LIM domains protein 2-like isoform X1 | 13                | 5.89%                      | 13.4%        | 39 kDa        |
|      |            | 3   | prf 671058A            | Glyceraldehyde-3-phosphate dehydrogenase              | 1                 | 3.29%                      | 15.9%        | 36 kDa        |
|      |            | 4   | XP_053649889.1         | Fructose-bisphosphate aldolase                        | 7                 | 2.59%                      | 2.59%        | 40 kDa        |

**Supplementary Table S3:** IgE-Binding in Heated Claw Analysed Using Liquid Chromatography-Mass Spectrometry. Top four most abundant proteins found for bands 1 - 4, including molecular weight (kDa), protein ID (NCBI), proteins found in each group, relative abundance (iBAQ%), coverage (%), protein mass (kDa).

| Band | MW of Band | Hit | Protein ID (NCBI) | Protein Name                                    | Proteins in Group | Relative Abundance (iBAQ%) | Coverage (%) | MW of Protein |
|------|------------|-----|-------------------|-------------------------------------------------|-------------------|----------------------------|--------------|---------------|
| 1    | 75 kDa     | 1   | AFP23115.1        | <b>Hemocyanin</b>                               | 1                 | 29.25%                     | 38.4%        | 78 kDa        |
|      |            | 2   | XP_053627537.1    | Hemocyanin B chain-like                         | 27                | 15.12%                     | 37.6%        | 78 kDa        |
|      |            | 3   | XP_053648131.1    | Tropomyosin isoform X17                         | 9                 | 12.00%                     | 35.2%        | 32 kDa        |
|      |            | 4   | XP_053640584.1    | Hemocyanin subunit-like                         | 51                | 8.89%                      | 23.3%        | 78 kDa        |
| 2    | 37 kDa     | 1   | XP_053648131.1    | <b>Tropomyosin isoform X17</b>                  | 9                 | 94.6%                      | 81%          | 33 kDa        |
|      |            | 2   | XP_053648135.1    | Tropomyosin isoform X21                         | 1                 | 2.37%                      | 83.1%        | 33 kDa        |
|      |            | 3   | XP_053641032.1    | Troponin T isoform X16                          | 2                 | 0.94%                      | 17.7%        | 33 kDa        |
|      |            | 4   | XP_042241082.1    | Tropomyosin isoform X24                         | 1                 | 0.83%                      | 80.6%        | 33 kDa        |
| 3    | 20 kDa     | 1   | XP_053629360.1    | <b>Myosin light chain 2</b>                     | 6                 | 50.82%                     | 13.8%        | 19 kDa        |
|      |            | 2   | XP_053648994.1    | Myosin light chain 2                            | 3                 | 38.08%                     | 12.3%        | 19 kDa        |
|      |            | 3   | XP_053634537.1    | Sarcoplasmic calcium-binding protein isoform X3 | 1                 | 3.42%                      | 6.7%         | 22 kDa        |
|      |            | 4   | XP_053648131.1    | Tropomyosin isoform X17                         | 9                 | 1.97%                      | 81%          | 33 kDa        |
| 4    | 17 kDa     | 1   | XP_053649409.1    | <b>Troponin C isoform X2</b>                    | 8                 | 56.36%                     | 59.4%        | 17 kDa        |
|      |            | 2   | XP_053642032.1    | Uncharacterised protein LOC128695440            | 1                 | 11.22%                     | 24.8%        | 16 kDa        |
|      |            | 3   | XP_053641032.1    | Troponin T isoform X16                          | 2                 | 5.27%                      | 9.9%         | 33 kDa        |

**Supplementary Table S4:** IgE-Binding in Raw Tail Analysed Using Liquid Chromatography-Mass Spectrometry. Top four most abundant proteins found for bands 1 - 3, including molecular weight (kDa), protein ID (NCBI), proteins found in each group, relative abundance (iBAQ%), coverage (%), protein mass (kDa).

| Band | MW of Band | Hit | Protein ID (NCBI)      | Protein Name                             | Proteins in Group | Relative Abundance (iBAQ%) | Coverage (%) | MW of Protein |
|------|------------|-----|------------------------|------------------------------------------|-------------------|----------------------------|--------------|---------------|
| 1    | 75 kDa     | 1   | AFP23115.1             | <b>Hemocyanin</b>                        | 1                 | 20.42%                     | 42.6%        | 78 kDa        |
|      |            | 2   | XP_053645744.1         | Arginine kinase                          | 107               | 10.69%                     | 33.9%        | 50 kDa        |
|      |            | 3   | XP_053631598.1         | Muscle-specific protein 300 kDa-like     | 4                 | 8.38%                      | 59.1%        | 70 kDa        |
|      |            | 4   | XP_053627537.1         | Hemocyanin B chain-like                  | 27                | 6.32%                      | 41%          | 78 kDa        |
| 2    | 37 kDa     | 1   | XP_053645744.1         | <b>Arginine kinase</b>                   | 107               | 70.64%                     | 53.7%        | 50 kDa        |
|      |            | 2   | XP_053648131.1         | Tropomyosin isoform X17                  | 9                 | 13.53%                     | 64.4%        | 33 kDa        |
|      |            | 3   | XP_053649889.1         | Fructose-bisphosphate aldolase-like      | 7                 | 4.90%                      | 65.8%        | 40 kDa        |
|      |            | 4   | sp P14208.4 KARG_HOMGA | Arginine kinase                          | 7                 | 2.41%                      | 37.4%        | 40 kDa        |
| 3    | 37 kDa     | 1   | XP_053645744.1         | <b>Arginine kinase</b>                   | 107               | 72.89%                     | 49.7%        | 50 kDa        |
|      |            | 2   | XP_053648131.1         | Tropomyosin isoform X17                  | 9                 | 11.64%                     | 65.1%        | 33 kDa        |
|      |            | 3   | XP_053649889.1         | Fructose-bisphosphate aldolase-like      | 7                 | 2.22%                      | 48.2%        | 40 kDa        |
|      |            | 4   | prf 671058A            | Glyceraldehyde-3-phosphate dehydrogenase | 1                 | 2.22%                      | 32.1%        | 36 kDa        |

**Supplementary Table S5:** IgE-Binding in Heated Tail Analysed Using Liquid Chromatography-Mass Spectrometry. Top four most abundant proteins found for bands 1 – 12, including molecular weight (kDa), protein ID (NCBI), proteins found in each group, relative abundance (iBAQ%), coverage (%), protein mass (kDa).

| Band | MW of Band | Hit | Protein ID (NCBI) | Protein Name                                     | Proteins in Group | Relative Abundance (iBAQ%) | Coverage (%) | MW of Protein |
|------|------------|-----|-------------------|--------------------------------------------------|-------------------|----------------------------|--------------|---------------|
| 1    | 100 kDa    | 1   | XP_053645272.1    | <b>Myosin heavy chain</b>                        | 21                | 28.58%                     | 34.8%        | 218 kDa       |
|      |            | 2   | XP_053645271.1    | Myosin heavy chain                               | 5                 | 17.56%                     | 33.5%        | 218 kDa       |
|      |            | 3   | XP_053648131.1    | Tropomyosin isoform X17                          | 9                 | 13.57%                     | 53.2%        | 33 kDa        |
|      |            | 4   | XP_053646515.1    | Proteoglycan 4-like                              | 1                 | 5.73%                      | 23.7%        | 67 kDa        |
| 2    | 75 kDa     | 1   | XP_053645272.1    | <b>Myosin heavy chain</b>                        | 21                | 27.34%                     | 34.2%        | 218 kDa       |
|      |            | 2   | XP_053648131.1    | Tropomyosin isoform X17                          | 9                 | 26.83%                     | 60.2%        | 33 kDa        |
|      |            | 3   | XP_053645271.1    | Myosin heavy chain                               | 5                 | 10.74%                     | 31.8%        | 2198kDa       |
|      |            | 4   | AFP23115.1        | Hemocyanin                                       | 1                 | 5.83%                      | 26.9%        | 78 kDa        |
| 3    | 57 kDa     | 1   | XP_053648131.1    | <b>Tropomyosin isoform X17</b>                   | 9                 | 41.06%                     | 54.9%        | 33 kDa        |
|      |            | 2   | XP_053645272.1    | Myosin heavy chain                               | 21                | 26.75%                     | 28.4%        | 218 kDa       |
|      |            | 3   | XP_053645271.1    | Myosin heavy chain                               | 5                 | 13.99%                     | 30.0%        | 218 kDa       |
|      |            | 4   | XP_053632103.1    | PDZ and LIM domain protein Zasp-like isoform X15 | 40                | 3.23%                      | 19.1%        | 127 kDa       |
| 4    | 50 kDa     | 1   | XP_053648131.1    | <b>Tropomyosin isoform X17</b>                   | 9                 | 95.28%                     | 81.7%        | 33 kDa        |
|      |            | 2   | XP_053629360.1    | Myosin light chain 2                             | 6                 | 0.87%                      | 23.7%        | 19 kDa        |
|      |            | 3   | XP_053641032.1    | Troponin T                                       | 2                 | 0.75%                      | 27.7%        | 33 kDa        |
|      |            | 4   | XP_053634537.1    | Sarcoplasmic calcium-binding protein             | 1                 | 0.34%                      | 45.6%        | 22 kDa        |
| 5    | 38 kDa     | 1   | XP_053648131.1    | <b>Tropomyosin isoform X17</b>                   | 9                 | 93.17%                     | 83.5%        | 33 kDa        |
|      |            | 2   | XP_053641032.1    | Troponin T isoform X16                           | 2                 | 0.82%                      | 31.6%        | 33 kDa        |

| Band | MW of Band | Hit | Protein ID (NCBI) | Protein Name                                    | Proteins in Group | Relative Abundance (iBAQ%) | Coverage (%) | MW of Protein |
|------|------------|-----|-------------------|-------------------------------------------------|-------------------|----------------------------|--------------|---------------|
|      |            | 3   | XP_053634537.1    | Sarcoplasmic calcium-binding protein isoform X3 | 1                 | 0.77%                      | 46.1%        | 22 kDa        |
|      |            | 4   | XP_053645744.1    | Arginine kinase isoform X3                      | 107               | 0.46%                      | 29.7%        | 50 kDa        |
| 6    | 37 kDa     | 1   | XP_053648131.1    | <b>Tropomyosin isoform X17</b>                  | 9                 | 98.14%                     | 84.5%        | 33 kDa        |
|      |            | 2   | XP_053629360.1    | Myosin light chain 2                            | 6                 | 0.75%                      | 44.8%        | 19 kDa        |
|      |            | 3   | XP_053641032.1    | Troponin T isoform X16                          | 2                 | 0.32%                      | 35.8%        | 33 kDa        |
|      |            | 4   | XP_045130235.1    | Tropomyosin isoform X23                         | 3                 | 0.27%                      | 80.6%        | 33 kDa        |
| 7    | 31 kDa     | 1   | XP_053648131.1    | <b>Tropomyosin isoform X17</b>                  | 9                 | 71.36%                     | 69.4%        | 33 kDa        |
|      |            | 2   | XP_053641032.1    | Troponin T isoform X16                          | 2                 | 12.23%                     | 31.6%        | 33 kDa        |
|      |            | 3   | XP_053646012.1    | Troponin isoform X7                             | 80                | 1.57%                      | 42.4%        | 28 kDa        |
|      |            | 4   | XP_053650292.1    | Protein lethal(2) essential for life-like       | 1                 | 1.44%                      | 52%          | 27 kDa        |
| 8    | 25 kDa     | 1   | XP_053648131.1    | <b>Tropomyosin isoform X17</b>                  | 9                 | 28.13%                     | 64.4%        | 33 kDa        |
|      |            | 2   | XP_053652529.1    | Adenylate kinase isoenzyme-1-like isoform X2    | 16                | 23.63%                     | 71.3%        | 22 kDa        |
|      |            | 3   | XP_053629360.1    | Myosin light chain 2                            | 6                 | 15.91%                     | 44.8%        | 19 kDa        |
|      |            | 4   | XP_053641032.1    | Troponin T isoform X16                          | 2                 | 4.43%                      | 26.6%        | 33            |
| 9    | 20 kDa     | 1   | XP_053629360.1    | <b>Myosin light chain 2</b>                     | 6                 | 78.87%                     | 89.1%        | 19 kDa        |
|      |            | 2   | XP_053634537.1    | Sarcoplasmic calcium-binding protein isoform X3 | 1                 | 10.05%                     | 70.5%        | 22 kDa        |
|      |            | 3   | XP_053634536.1    | Sarcoplasmic calcium-binding                    | 1                 | 4.91%                      | 73.6%        | 22 kDa        |

| Band | MW of Band | Hit | Protein ID (NCBI)       | Protein Name                                    | Proteins in Group | Relative Abundance (iBAQ%) | Coverage (%) | MW of Protein |
|------|------------|-----|-------------------------|-------------------------------------------------|-------------------|----------------------------|--------------|---------------|
|      |            |     |                         | protein isoform X2                              |                   |                            |              |               |
|      |            | 4   | XP_053641032.1          | Troponin T isoform X16                          | 2                 | 1.57%                      | 25.2%        | 33 kDa        |
| 10   | 18 kDa     | 1   | XP_053629360.1          | <b>Myosin light chain 2</b>                     | 6                 | 50.33%                     | 62.1%        | 19 kDa        |
|      |            | 2   | XP_053634537.1          | Sarcoplasmic calcium-binding protein isoform X3 | 1                 | 12.60%                     | 62.7%        | 22 kDa        |
|      |            | 3   | XP_053641032.1          | Troponin T isoform X16                          | 2                 | 8.84%                      | 22.3%        | 33 kDa        |
|      |            | 4   | XP_053648131.1          | Tropomyosin isoform X17                         | 9                 | 5.52%                      | 59.2%        | 33 kDa        |
| 11   | 17 kDa     | 1   | XP_053656247.1          | <b>Myosin light chain 1 isoform X3</b>          | 18                | 45.10%                     | 57.9%        | 15 kDa        |
|      |            | 2   | XP_053635594.1          | Sodium/calcium exchanger regulatory protein 1   | 8                 | 7.97%                      | 57.4%        | 16 kDa        |
|      |            | 3   | XP_053629360.1          | Myosin light chain 2                            | 6                 | 6.15%                      | 35.6%        | 19 kDa        |
|      |            | 4   | XP_053632402.1          | 2-iminobutanolate/2-iminopropanoate deaminase   | 9                 | 5.37%                      | 39.7%        | 14 kDa        |
| 12   | 16 kDa     | 1   | XP_053656247.1          | <b>Myosin light chain 1 isoform X3</b>          | 18                | 27.86%                     | 57.9%        | 15 kDa        |
|      |            | 2   | XP_053649414.1          | Troponin C isoform X2                           | 2                 | 14.48%                     | 77.3%        | 17 kDa        |
|      |            | 3   | XP_053629360.1          | Myosin light chain 2                            | 6                 | 13.87%                     | 35.6%        | 19 kDa        |
|      |            | 4   | sp P06707.1 TNNC1_ASTLP | Troponin C isoform X2                           | 6                 | 6.53%                      | 31.3%        | 17 kDa        |

**Supplementary Table S6:** IgE-Binding in Raw Cephalothorax Analysed Using Liquid Chromatography-Mass Spectrometry. Top four most abundant proteins found for bands 1 - 5, including molecular weight (kDa), protein ID (NCBI), proteins found in each group, relative abundance (iBAQ%), coverage (%), protein mass (kDa).

| Extract | MW of Band | Hit | Protein ID (NCBI) | Protein Name                                           | Proteins in Group | Relative Abundance (iBAQ%) | Coverage (%) | MW of Protein |
|---------|------------|-----|-------------------|--------------------------------------------------------|-------------------|----------------------------|--------------|---------------|
| 1       | 75 kDa     | 1   | AFP23115.1        | <b>Hemocyanin</b>                                      | 1                 | 29.67%                     | 38.7%        | 78 kDa        |
|         |            | 2   | XP_053627537.1    | Hemocyanin B chain                                     | 27                | 16.51%                     | 39%          | 78 kDa        |
|         |            | 3   | AAG17936.1        | Vitellogenin                                           | 15                | 12.31%                     | 31.2%        | 292 kDa       |
|         |            | 4   | XP_053640584.1    | Hemocyanin subunit                                     | 51                | 11.17%                     | 33.3%        | 78 kDa        |
| 2       | 57 kDa     | 1   | XP_053627537.1    | <b>Hemocyanin B chain</b>                              | 27                | 19.59%                     | 39.3%        | 78 kDa        |
|         |            | 2   | AFP23115.1        | Hemocyanin                                             | 1                 | 16.58%                     | 34.1%        | 78 kDa        |
|         |            | 3   | AAG17936.1        | Vitellogenin                                           | 15                | 13.08%                     | 32.8%        | 292 kDa       |
|         |            | 4   | XP_053640579.1    | Hemocyanin subunit                                     | 1                 | 10.67%                     | 35.9%        | 78 kDa        |
| 3       | 37 kDa     | 1   | XP_053648131.1    | <b>Tropomyosin isoform X17</b>                         | 9                 | 46.47%                     | 62.3%        | 33 kDa        |
|         |            | 2   | XP_053640001.1    | Mannan endo-1,4-beta-mannosidase                       | 1                 | 18.52%                     | 22.3%        | 43 kDa        |
|         |            | 3   | XP_053642615.1    | Vitellogenin                                           | 2                 | 3.53%                      | 21.1%        | 310 kDa       |
|         |            | 4   | XP_053656677.1    | Mannan endo-1,4-beta-mannosidase                       | 1                 | 2.60%                      | 19.4%        | 41 kDa        |
| 4       | 19 kDa     | 1   | XP_053634537.1    | <b>Sarcoplasmic calcium-binding protein isoform X3</b> | 1                 | 46.73%                     | 62.7%        | 22 kDa        |
|         |            | 2   | XP_053634538.1    | Sarcoplasmic calcium-binding protein isoform X4        | 1                 | 8.94%                      | 47.2%        | 22 kDa        |
|         |            | 3   | XP_053648131.1    | Tropomyosin isoform X17                                | 9                 | 8.75%                      | 55.6%        | 33 kDa        |
|         |            | 4   | XP_053634536.1    | Sarcoplasmic calcium-binding                           | 1                 | 5.03%                      | 57.5         | 22 kDa        |

| Extract | MW of Band | Hit | Protein ID (NCBI) | Protein Name                                         | Proteins in Group | Relative Abundance (iBAQ%) | Coverage (%) | MW of Protein |
|---------|------------|-----|-------------------|------------------------------------------------------|-------------------|----------------------------|--------------|---------------|
|         |            |     |                   | protein isoform X2                                   |                   |                            |              |               |
| 5       | 17 kDa     | 1   | XP_053635594.1    | <b>Sodium/calcium exchanger regulatory protein 1</b> | 8                 | 9.46%                      | 57.4%        | 16 kDa        |
|         |            | 2   | XP_053648131.1    | Tropomyosin isoform X17                              | 9                 | 7.59%                      | 54.9%        | 33 kDa        |
|         |            | 3   | XP_053651723.1    | Fatty acid-binding protein                           | 1                 | 5.98%                      | 36.9%        | 14 kDa        |
|         |            | 4   | XP_053639178.1    | Hemocyanin                                           | 8                 | 5.49%                      | 11.8%        | 76 kDa        |

**Supplementary Table S7:** IgE-Binding in Heated Cephalothorax Analysed Using Liquid Chromatography-Mass Spectrometry. Top four most abundant proteins found for bands 1 and 2, including molecular weight (kDa), protein ID (NCBI), proteins found in each group, relative abundance (iBAQ%), coverage (%), protein mass (kDa).

| Extract | MW of Band | Hit | Protein ID (NCBI) | Protein Name                                    | Proteins in Group | Relative Abundance (iBAQ%) | Coverage (%) | MW of Protein |
|---------|------------|-----|-------------------|-------------------------------------------------|-------------------|----------------------------|--------------|---------------|
| 1       | 75 kDa     | 1   | AFP23115.1        | <b>Hemocyanin</b>                               | 1                 | 29.28%                     | 34.1%        | 78 kDa        |
|         |            | 2   | AAG17936.1        | Vitellogenin                                    | 15                | 16.58%                     | 29.2%        | 292 kDa       |
|         |            | 3   | XP_053627537.1    | Hemocyanin B chain                              | 27                | 10.97%                     | 31.6%        | 78 kDa        |
|         |            | 4   | XP_053648131.1    | Tropomyosin isoform X17                         | 9                 | 8.67%                      | 44.4%        | 33 kDa        |
| 2       | 37 kDa     | 1   | XP_053648131.1    | <b>Tropomyosin isoform X17</b>                  | 9                 | 94.25%                     | 70.1%        | 33 kDa        |
|         |            | 2   | XP_053636460.1    | Oplophorus-luciferin 2-monooxygenase isoform X1 | 2                 | 2.52%                      | 11.3%        | 38 kDa        |
|         |            | 3   | XP_042241082.1    | Tropomyosin isoform X24                         | 1                 | 0.37%                      | 70.1%        | 33 kDa        |
|         |            | 4   | KAG0711415.1      | Succinate-CoA ligase                            | 9                 | 0.24%                      | 10.1%        | 13 kDa        |
